# Supplementary material for: Lactate Kinetics Reflect Organ Dysfunction and Are Associated with Adverse Outcomes in Intensive Care Unit Patients with COVID-19 Pneumonia: Preliminary Results from a GREEK Single-Centre Study
Source: Metabolites. 2020 Sep 28;10(10):386. doi: 10.3390/metabo10100386 (PMC7599563; doi:10.3390/metabo10100386)
Supplement: Supplementary file 1 [file metabolites-10-00386-s001.xlsx]

## Sheet: Φύλλο1
S/N	AGE	GENDER	ADMISSION IN ICU	COMORBIDITIES	MECHANICAL VENTILATION	APACHE II_1	SOFA_1	SOFA_3	SOFA_5	SOFA_8	SOFA_10	SOFA _12	SOFA_14	LAC_1A	LAC_1B	LAC_1C	LAC_2A	LAC_2B	LAC_2C	Mean Lac 1/2	LAC_3A	LAC_3B	LAC_3C	Mean Lac3	LAC_4A	LAC_4B	LAC_4C	Mean Lac4	LAC_5A	LAC_5B	LAC_5C	Mean Lac5	LAC_6A	LAC_6B	LAC_6C	Mean Lac6	LAC_7A	LAC_7B	LAC_7C	Mean Lac7	LAC_8A	LAC8b	LAC 8C	Mean Lac8	LAC_9A	LAC_9B	LAC_9C	Mean Lac9	LAC_10A
1	58	2	24.3.20	ASTHMA LIPIDS HYPERT HEPATITIS	1	14	11	8	8	5	6	6	10	0.5	0.6		0.5	0.7	0.8	0.62	1	0.6		0.8	1	1		1	1.2	0.7	1.3	1.06667	1	1.1		1.05	0.8	0.8	1.6	1.06667	1.7	1.6		1.65	1.8	1.4	1.6	1.6	1.2
2	70	1	20.3.20	HYPERT LIPIDS G/O REFLUX	1	14	10	8	8	7	4	4	3	1.3	1.5	1.6	2.1	1.5	1.7	1.61667	1.7	1.8		1.75	1.4	1		1.2	1.4	1.1	1	1.16667	0.8	0.8	0.9	0.833333	1.6	0.8		1.2	0.9	0.7	0.8	0.8	0.8	1		0.9	0.9
3	66	2	22.3.20	OBESITY	1	15	9	8	8	9	8	9	8	0.5	0.7	0.6	0.6	0.5	0.6	0.583333	0.9	0.6	0.6	0.7	0.9	0.7	0.7	0.766667	1.2	1.1	0.9	1.06667	0.6	0.8	0.6	0.666667	0.8	0.7	0.6	0.7	0.8	0.8		0.8	0.6	1.2		0.9	1.1
4	53	2	26.3.20	OBESITY	1	15	10	8	8	9	9	8	10	0.9	0.7		0.9	0.7		0.8	2	1.5	1.3	1.6	1.1	0.9		1	0.8	1	0.9	0.9	0.9	0.7		0.8	0.7	0.6		0.65	1.2	0.7		0.95	0.9	0.8	0.8	0.833333	0.9
5	62	1	25.3.20	-	1	18	8	8	9	8	4	4	4	0.9	1.6		1.7	1.6		1.45	1.5	1.3	2.1	1.63333	1.5	2.1		1.8	1.7	1.9		1.8	1.4	1.6		1.5	1.7	1.4	1.5	1.53333	1	1.3		1.15	1.3	0.9	1	1.06667	0.7
6	64	1	23.3.20	HYPERTHYROID LIPIDS	1	17	11	11	10	8	8	2	2	1.4	1.7	2.2	2.2	2.4		1.98	1.8	1.5	1.5	1.6	1.8	1.1		1.45	1.3	1.1		1.2	1.2	1.9		1.55	1.8	1.2		1.5	1	1.1		1.05	1	0.9		0.95	0.8
7	52	1	23.4.20	-	1	11	9	5	5	4				1.7	1.3	1.2	1.1	1.2	1.4	1.31667	1.3	1.2	1.1	1.2	1.1	1.1	1.2	1.13333	1.2	1.2		1.2	1.2	1		1.1	0.9	0.9		0.9	0.8	0.9		0.85	1.1	0.9		1	1.1
8	55	1	21.4.20	HYPERT	1	13	8	9	9	5	4	2		1.1	0.9		0.9	0.7	1	0.92	1.1	0.9	1.2	1.06667	1	0.9		0.95	1.3	1		1.15	1.1	1.3	1	1.13333	1	0.8	0.8	0.866667	1	0.7	0.9	0.866667	1	1	0.9	0.966667	0.9
9	68	1	6.4.20	HYPERT	1	18	9	3	4	3	4			1.6	1.7		1.7	1.7		1.675	1.8	1.8	2.1	1.9	1	1.2	1.2	1.13333	1.2	1.5		1.35	1.3	1.9		1.6	1.6	2.2		1.9	1.8			1.8	1			1	1.1
10	54	1	1.4.20	-	2	10	4	3	2	2				1.4	1.1		0.9	0.8		1.05	0.8	0.7		0.75	1	0.9		0.95	0.9	0.7		0.8	0.9	0.9		0.9	0.8	0.9		0.85	1	0.9		0.95	0.7	0.9		0.8	1.2
11	61	1	3.4.20	HYPERT DIABETES	1	22	10	9	9	7	9	8	7	1	1	0.9	1.1	1.5	1.1	1.1	0.9	1.1	1.2	1.06667	1.2	1.1	1	1.1	1.1	0.7		0.9	1	1	1.1	1.03333	1.1	1.1	1.1	1.1	0.8	0.8	0.8	0.8	0.9	0.6		0.75	0.8
12	70	1	22.3.20	DIABETES HYPERT	1	21	11	8	7	8	8	5	7	0.8	1.4	1.1	1	0.9	1.4	1.1	0.9	1.5	1.7	1.36667	0.9	1.1	1.2	1.06667	1.2	0.9	1.4	1.16667	0.9	1.5	0.7	1.03333	1.1	1.2	0.9	1.06667	1.1	0.8	0.7	0.866667	0.9	0.9	1	0.933333	0.9
13	67	1	9.4.20	CAD DIABETES HYPERT LIPIDS	1	14	5	5	5	8	8	8	8			1	0.9	0.8		0.9	0.9	1.3	0.8	1	1.2	1.1	1.5	1.26667	1	0.8		0.9	1.3	1	0.9	1.06667	1.3	1.3		1.3	1.3	1		1.15	0.8	1.1	1.1	1	0.8
14	62	1	4.4.20	ARRYTHMIA	1	17	7	10	11	12	11	9	12	1	0.9	0.7	0.9	0.8	0.8	0.85	0.9	1	1.1	1	1.1	0.9	0.9	0.966667	0.9	1	0.9	0.933333	1	0.9	1.2	1.03333	0.9	0.8	0.7	0.8	0.8	0.9	1.1	0.933333	1	1.2	1	1.06667	1
15	56	2	20.3.20	HYPERT OBESITY	1	16	9	10	8	10	9	9	8	0.6	0.8	0.9	0.9	1	1.1	0.883333	1.6	2		1.8	2	2.2		2.1	2.4	3.2	3.4	3	3.4	3.7	4.2	3.76667	4.8	4.7		4.75	2.9	3.3		3.1	2.4	4.6	4.9	3.96667	3
16	61	1	14.4.20	HYPERT LIPIDS THROMBOSIS	1	15	6	9	9	10	12	11	11	1	1.4	1.1	1.4	1.7	2	1.43333	1.5	1.7	1.5	1.56667	1.4	1.9	1.1	1.46667	2.5	2.2	1.8	2.16667	2.6		2.8	2.7	2.5	3.8	3.6	3.3	2.6	2.3	2	2.3	2	1.7	1.6	1.76667	1.4
17	82	2	23.4.20	HYPERT	1	18	8	9	9	9	9		8	0.7	0.8	0.7	0.5	0.5	0.6	0.633333	0.5	0.5	0.7	0.566667	0.5	0.5		0.5	0.4	0.5		0.45	0.5	0.6	0.8	0.633333	0.5	0.9	0.7	0.7	0.8	0.9	0.7	0.8	0.6	0.7		0.65	0.7
18	70	1	25.3.20	HYPERT LYMPHOMA	1	19	7	6	3	4	3			1	0.9	1	1	0.7	0.6	0.866667	0.5	0.7		0.6	0.6	1.8	0.5	0.966667	0.6	0.5		0.55	0.6	0.8	1.2	0.866667	0.6	0.6	0.5	0.566667	0.5	0.7		0.6	0.7	0.7		0.7	0.7
19	75	1	23.3.20	HYPERT A FIBRIL HYPOTHYROID RENAL CA	1	21	9	9	11	10	11	9	11		1.6	2.3	3.2	3.4	3.5	2.8	3.1	3.8	4.3	3.73333	3.9	3.6	3.1	3.53333	3.3	3		3.15	2.8	2.2	1.7	2.23333	1.7	1.5	1.5	1.56667	1.6	2	2	1.86667	1.6	2	1.9	1.83333	1.6
20	79	1	13.4.20	HYPERT BENIGN PROSTATE	1	19	9	10	10	9	10	8	7	2.1	2.1	2.2	2.4	1.9	1.8	2.08333	2.3	2.2	2.3	2.26667	1.7	1.4	1.8	1.63333	1.7	1.8		1.75	2.1	1.7	1.9	1.9	2	2.1	1.7	1.93333	1.5	1.5	1.4	1.46667	1.3	1.5	1.4	1.4	1.2
21	78	1	26.3.20	-	1	18	10	10	11	13	13	7	12	1.6	2.2	1.7	1.7	2.3	1.8	1.88333	1.6	1.4	1.2	1.4	1.4	1.5		1.45	1.6	1.9	1.7	1.73333	1.8	2.1	1.6	1.83333	1.7	1.7		1.7	1.7	1.6	2.4	1.9	1.7	2.3	1.8	1.93333	1.5
22	69	1	28.4.20	HYPERT	1	22	11	9	7	8	13			1.2	1.7	1.7	2	2	2.2	1.8	2.3	3.1	3.1	2.83333	2.1	2.2	2.3	2.2	2.2	2.5	2.5	2.4	2.5	2.2	2.3	2.33333	2.4	2.3	2.7	2.46667	2.8	2.6	1.9	2.43333	1.4	1.7	1.7	1.6	1.5
23	58	1	22.3.20	-	2	7	5	3	3	3	2			0.8	2.1		0.7	0.7		1.075	0.9	0.7		0.8	1.7		1.2	1.45	0.7	1.3		1	0.9	1.1		1	1.3	1.1		1.2	0.7			0.7	1			1	0.7
24	61	1	27.3.20	-	2	5	3	6		3				1	0.9		1.4	1.1		1.1	0.7			0.7	1.1	1.1		1.1	1.2	1.7		1.45	0.7	0.9		0.8	0.7	0.6		0.65	1.1	0.7		0.9	1.1			1.1	1.4
25	71	1	6.4.20	HYPERT	1	24	10	9	6	4	3	1			1	1.3	1	0.8	1	1.02	0.8	0.9	0.8	0.833333		0.6	0.8	0.7	0.6	0.8	0.9	0.766667	0.9	0.9		0.9	0.6			0.6	0.9	0.7	0.8	0.8	1.3	1.1	1.8	1.4	1.5
26	53	2	1.4.20	-	1	16	8	4	10	4	1	3		0.7	0.9		1.4	1.1		1.025	1.7	1.6	1.3	1.53333	1.2	1.4	1.2	1.26667	1.3	1.1		1.2	0.5	0.9		0.7	1	1.9		1.45	1.4			1.4	1.5	1.2		1.35	0.9
27	71	1	27.3.20	-	1	17	9	5	8	10	9		4	1.3	1.8		1.3	1.2	1.5	1.42	2.2	1.8		2	3.1	5.3	2.1	3.5	1.8	1.4	1.4	1.53333	1.4	1.7		1.55	1.5	1.8	2.2	1.83333	2.4	3.1	2.4	2.63333	1.5	1.3	1.3	1.36667	1.4
28	59	1	27.3.20	SLEEP APNEA CPAP	2	9	3	5	5			2		0.9	0.9		0.8	1	1	0.92	0.8	0.8		0.8	1.1			1.1	0.7	0.7		0.7	0.7			0.7	0.8	1		0.9	0.8			0.8	0.9			0.9	1
29	46	1	2.4.20	-	1	16	8	9	5	5	9		1	1.8	0.8		0.8	0.9		1.075	0.8	1	1.1	0.966667	0.6	0.9	0.9	0.8	1.2	0.8	1	1	0.8	0.8		0.8	0.9	1		0.95	1.1	1.3		1.2	1	0.7		0.85	1.1
30	59	2	27.3.20	-	1	18	8	9	10	13	15			1	9		1.4	1.1	1.2	2.74	1.4	1.1	0.9	1.13333	1.1	1	0.8	0.966667	1.1	1.2		1.15	1.1	1.6	1.4	1.36667	1.3	1.5		1.4	1.9	2.5	3.9	2.76667	4.5			4.5
31	85	1	27.3.20	CAD VALVE	1	14	7	9	13	15				2	1.8		1.5	1.9		1.8	1.6	2		1.8	2	2.1		2.05	2	2.6	2.7	2.43333	1.8	1.8		1.8	2	1.5		1.75	2	2.4		2.2
32	65	1	14.3.20	-	1	15	9	8	5			9			0.5	0.7	1	0.8	2.3	1.06	2.4	1.9	0.6	1.63333	0.5	0.5	0.5	0.5	0.5	0.7		0.6
33	65	1	27.3.20	COPD	1	18	10	12	13	15	15	9	16	1.9	1.2	1	1.6	1.7	1.6	1.5	1.2	1.2	1.3	1.23333		1.3	1.2	1.25	1.4	1.4	1.3	1.36667	1.2	0.9	1	1.03333	1.3	0.9	0.9	1.03333	1.1	1.2	1	1.1	1.3	1.2	1	1.16667	1.8
34	68	1	27.3.20	-	1	16	8	9	9	10	9	10	11	1.5	1.3		1.3	1.2	1.7	1.4	1.8	1.8		1.8	1.5	2	1.9	1.8	1.8	1.9	1.7	1.8	1.6	2	1.7	1.76667	1.7	1.7	2.1	1.83333	1.9	1.8	2.1	1.93333	1.8	2.2		2	2.5
35	58	1	27.3.20	DIABETES (INSULIN)	1	17	9	11	11	9	9		12	2.2	1.7	1.7	1.7	1.6	1.6	1.75	1.5	1.4		1.45	1.6	1.6		1.6	2	1.8	1.5	1.76667	1.2		1.4	1.3	1.4	1.3	2	1.56667	1.8	2.1	2.2	2.03333	2.1	1.9	1.9	1.96667	2.6
36	47	1	15.4.20	LYMPHOMA PULM EMBOL	1	23	12	10						1.3	0.9		0.8	0.9	1	0.98	9.2	12.8		11
37	70	1	22.3.20	HYPERT STEN KAROTIVN LIPDS	1	22	11	12						0.8	1	1.5	1.6	5.4		2.06	7.1	6.9		7	4.6	8.6		6.6
38	74	2	19.3.20	OBESITY DEPRESSION HYPERT	1	24	10	9				8		1.1	1	1.1	1.1	1.2	1.3	1.13333	1.2	1.6		1.4	2.1	8.1		5.1
39	85	2	3.5.20	HYPERT LIPIDS	1	18	8	8	8	9	8	1	8	1	1	1	1.1	0.9	1	1	1.4	1.1	1	1.16667	0.9	0.8	0.8	0.833333	1.2	1	1	1.06667	1	0.8	0.9	0.9	1.1	1	1.2	1.1	1.2	1.3	1	1.16667	0.9	1.1		1	0.9
40	52	1	6.5.20	-	2	8	3	4	4	3	2		1	0.7	0.9	0.7	0.6	1.2		0.82	1.5	1.3	1.2	1.33333	1	1.1	1.2	1.1	0.9	1	1.1	1	1.1	0.9	1	1	0.8	1	1	0.933333
41	78	1	19.3.20	DIABETES LIPIDS REN FAIL URIC ACID CAD	1	22	13	13				5		2	1.8		1.6	4.5		2.475	5.2			5.2	5.7			5.7
42	43	1	30.3.20	-	1	18	8	9	9	8	7						1.2	1.3		1.25	1.3	1.1	1	1.13333	0.8	1.1	0.9	0.933333	1.3	1		1.15	1	1.2	0.9	1.03333	1.1	0.9	1.1	1.03333
43	54	2	21.3.20	CHOLESTEROL BELLS PALSY TBC PLEVRITIS	2	4	1					3		0.9	0.5					0.7
44	65	2	27.3.20	-	1	16	8	4	5	4	5	2	2	1.2	0.8	1	1	1	0.9	0.983333	1.2	1.3	1	1.16667	0.9	1.3	1.4	1.2	1	1.2	0.9	1.03333	1	1.1		1.05	0.7	0.9		0.8	0.7	0.8	0.6	0.7	1.2	0.6	0.7	0.833333	1.2
45	60	2	9.5.20	LIPIDS	1	18	11	9	8	8	8		5	1.1	1		0.8	1.2	1	1.02	1.3	1.2	1.6	1.36667	1.5	1.4	1	1.3	1.4	1.3	1.5	1.4	1.7	1.4		1.55	1.6	1.4	1.4	1.46667	1.5	1.4	1.3	1.4
[truncated: 23 more columns]

## Sheet: Φύλλο4
1.1751	1.69985
1.30808	3.31667
1.29444	2.77667
1.26364	1.64524
1.24899	1.6
1.29899	1.675
1.2371	2.07778
1.19389	2.24667
1.17889	2.725
1.47685	2.2
1.37963	1.75
1.23438	1.70833
1.19286	3.40833
1.26791	2.21766
		2.0705e-05

## Sheet: Φύλλο2
Mean Lac 1/2	Mean Lac3	Mean Lac4	Mean Lac5	Mean Lac6	Mean Lac7	Mean Lac8	Mean Lac9	Mean Lac10	Mean Lac11	Mean Lac12	Mean Lac13	Mean Lac14	DURATION ICU STAY (DAYS)	DAY OF DEATH	14-DEATH	28 days icu mortality 15 MAY 2020
0.62	0.8	1	1.06667	1.05	1.06667	1.65	1.6	1.63333	3.05	2.15	1.3	1.1	40		0	1
1.61667	1.75	1.2	1.16667	0.833333	1.2	0.8	0.9	0.95					12		2	1
0.583333	0.7	0.766667	1.06667	0.666667	0.7	0.8	0.9	1.2	1.2	1.5	1.1	1.4	19		0	1
0.8	1.6	1	0.9	0.8	0.65	0.95	0.833333	0.95	1.35	0.95	1.6	1.3	28		0	1
1.45	1.63333	1.8	1.8	1.5	1.53333	1.15	1.06667	0.966667					13		1	1
1.98	1.6	1.45	1.2	1.55	1.5	1.05	0.95	1.05	1.2	1.3	1.65	1.15	16		0	1
1.31667	1.2	1.13333	1.2	1.1	0.9	0.85	1	1.05					11		3	1
0.92	1.06667	0.95	1.15	1.13333	0.866667	0.866667	0.966667	0.8	0.8	0.8	0.7	0.7	18		0	1
1.675	1.9	1.13333	1.35	1.6	1.9	1.8	1	1.1					7		7	1
1.05	0.75	0.95	0.8	0.9	0.85	0.95	0.8	1.05					3		11	1
1.1	1.06667	1.1	0.9	1.03333	1.1	0.8	0.75	0.833333	0.75	0.85	0.8	0.7	40		0	1
1.1	1.36667	1.06667	1.16667	1.03333	1.06667	0.866667	0.933333	1							0	1
0.9	1	1.26667	0.9	1.06667	1.3	1.15	1	0.85	0.8	0.966667	1.05	1.2			0	1
0.85	1	0.966667	0.933333	1.03333	0.8	0.933333	1.06667	1.05	2.55	2.16667	1.63333	0.9			0	1
0.883333	1.8	2.1	3	3.76667	4.75	3.1	3.96667	3.16667	3.63333	2.9	1.96667	2.2			0	1
1.43333	1.56667	1.46667	2.16667	2.7	3.3	2.3	1.76667	1.56667	1.3	1.15	1.25	1.13333	40		0	1
0.633333	0.566667	0.5	0.45	0.633333	0.7	0.8	0.65	0.75	1.65	1.7	1.2	1.3			0	1
0.866667	0.6	0.966667	0.55	0.866667	0.566667	0.6	0.7	0.7					10		4	1
2.8	3.73333	3.53333	3.15	2.23333	1.56667	1.86667	1.83333	1.73333	1.2	1.5	1.1	1.25			0	1
2.08333	2.26667	1.63333	1.75	1.9	1.93333	1.46667	1.4	1.6							0	1
1.88333	1.4	1.45	1.73333	1.83333	1.7	1.9	1.93333	1.45	2.05	1.4	1.9	1.66667	40		0	1
1.8	2.83333	2.2	2.4	2.33333	2.46667	2.43333	1.6	4.7					11	11	3	2
1.075	0.8	1.45	1	1	1.2	0.7	1	0.7					10		4	1
1.1	0.7	1.1	1.45	0.8	0.65	0.9	1.1	1.4					10		4	1
1.02	0.833333	0.7	0.766667	0.9	0.6	0.8	1.4	1.2	0.7	0.95			15		0	1
1.025	1.53333	1.26667	1.2	0.7	1.45	1.4	1.35	0.8	0.9	0.8	0.7		14		0	1
1.42	2	3.5	1.53333	1.55	1.83333	2.63333	1.36667	1.76667	1.45	2			12		2	1
0.92	0.8	1.1	0.7	0.7	0.9	0.8	0.9	1					13		1	1
1.075	0.966667	0.8	1	0.8	0.95	1.2	0.85	0.85	0.9	0.75	0.8	0.7	11		3	1
2.74	1.13333	0.966667	1.15	1.36667	1.4	2.76667	4.5						9	9	5	2
1.8	1.8	2.05	2.43333	1.8	1.75	2.2							8	8	6	2
1.06	1.63333	0.5	0.6										5	5	9	2
1.5	1.23333	1.25	1.36667	1.03333	1.03333	1.1	1.16667	1.56667	1.45	1.35	1.46667	2.86667	14	14	0	2
1.4	1.8	1.8	1.8	1.76667	1.83333	1.93333	2	2.53333	2.85	2.15	1.95	3.95	17	17	0	2
1.75	1.45	1.6	1.76667	1.3	1.56667	2.03333	1.96667	2.1	2.3				11	11	3	2
0.98	11												3	3	11	2
2.06	7	6.6											4	4	10	2
1.13333	1.4	5.1											5	5	9	2
1	1.16667	0.833333	1.06667	0.9	1.1	1.16667	1	1.13333							0	1
0.82	1.33333	1.1	1	1	0.933333										0	1
2.475	5.2	5.7											4	4	10	2
1.25	1.13333	0.933333	1.15	1.03333	1.03333								12		2	1
0.7													2		12	1
0.983333	1.16667	1.2	1.03333	1.05	0.8	0.7	0.833333	1.06667	1.1	1	1		13		1	1
1.02	1.36667	1.3	1.4	1.55	1.46667	1.4									0	1
															0

## Sheet: Φύλλο9
0.62	1.61667	0.583333	0.8	1.45	1.98	1.31667	0.92	1.675	1.05	1.1	1.1	0.9	0.85	0.883333	1.43333	0.633333	0.866667	2.8	2.08333	1.88333	1.8	1.075	1.1	1.02	1.025	1.42	0.92	1.075	2.74	1.8	1.06	1.5	1.4	1.75	0.98	2.06	1.13333	1	0.82	2.475	1.25	0.7	0.983333	1.02
0.8	1.75	0.7	1.6	1.63333	1.6	1.2	1.06667	1.9	0.75	1.06667	1.36667	1	1	1.8	1.56667	0.566667	0.6	3.73333	2.26667	1.4	2.83333	0.8	0.7	0.833333	1.53333	2	0.8	0.966667	1.13333	1.8	1.63333	1.23333	1.8	1.45	11	7	1.4	1.16667	1.33333	5.2	1.13333		1.16667	1.36667
1	1.2	0.766667	1	1.8	1.45	1.13333	0.95	1.13333	0.95	1.1	1.06667	1.26667	0.966667	2.1	1.46667	0.5	0.966667	3.53333	1.63333	1.45	2.2	1.45	1.1	0.7	1.26667	3.5	1.1	0.8	0.966667	2.05	0.5	1.25	1.8	1.6		6.6	5.1	0.833333	1.1	5.7	0.933333		1.2	1.3
1.06667	1.16667	1.06667	0.9	1.8	1.2	1.2	1.15	1.35	0.8	0.9	1.16667	0.9	0.933333	3	2.16667	0.45	0.55	3.15	1.75	1.73333	2.4	1	1.45	0.766667	1.2	1.53333	0.7	1	1.15	2.43333	0.6	1.36667	1.8	1.76667				1.06667	1		1.15		1.03333	1.4
1.05	0.833333	0.666667	0.8	1.5	1.55	1.1	1.13333	1.6	0.9	1.03333	1.03333	1.06667	1.03333	3.76667	2.7	0.633333	0.866667	2.23333	1.9	1.83333	2.33333	1	0.8	0.9	0.7	1.55	0.7	0.8	1.36667	1.8		1.03333	1.76667	1.3				0.9	1		1.03333		1.05	1.55
1.06667	1.2	0.7	0.65	1.53333	1.5	0.9	0.866667	1.9	0.85	1.1	1.06667	1.3	0.8	4.75	3.3	0.7	0.566667	1.56667	1.93333	1.7	2.46667	1.2	0.65	0.6	1.45	1.83333	0.9	0.95	1.4	1.75		1.03333	1.83333	1.56667				1.1	0.933333		1.03333		0.8	1.46667
1.65	0.8	0.8	0.95	1.15	1.05	0.85	0.866667	1.8	0.95	0.8	0.866667	1.15	0.933333	3.1	2.3	0.8	0.6	1.86667	1.46667	1.9	2.43333	0.7	0.9	0.8	1.4	2.63333	0.8	1.2	2.76667	2.2		1.1	1.93333	2.03333				1.16667					0.7	1.4
1.6	0.9	0.9	0.833333	1.06667	0.95	1	0.966667	1	0.8	0.75	0.933333	1	1.06667	3.96667	1.76667	0.65	0.7	1.83333	1.4	1.93333	1.6	1	1.1	1.4	1.35	1.36667	0.9	0.85	4.5			1.16667	2	1.96667				1					0.833333
1.63333	0.95	1.2	0.95	0.966667	1.05	1.05	0.8	1.1	1.05	0.833333	1	0.85	1.05	3.16667	1.56667	0.75	0.7	1.73333	1.6	1.45	4.7	0.7	1.4	1.2	0.8	1.76667	1	0.85				1.56667	2.53333	2.1				1.13333					1.06667
3.05		1.2	1.35		1.2		0.8			0.75		0.8	2.55	3.63333	1.3	1.65		1.2		2.05				0.7	0.9	1.45		0.9				1.45	2.85	2.3									1.1
2.15		1.5	0.95		1.3		0.8			0.85		0.966667	2.16667	2.9	1.15	1.7		1.5		1.4				0.95	0.8	2		0.75				1.35	2.15										1
1.3		1.1	1.6		1.65		0.7			0.8		1.05	1.63333	1.96667	1.25	1.2		1.1		1.9					0.7			0.8				1.46667	1.95										1
1.1		1.4	1.3		1.15		0.7			0.7		1.2	0.9	2.2	1.13333	1.3		1.25		1.66667								0.7				2.86667	3.95

## Sheet: Φύλλο3
1/2	0.62	1.61667	0.583333	0.8	1.45	1.98	1.31667	0.92	1.675	1.05	1.1	1.1	0.9	0.85	0.883333	1.43333	0.633333	0.866667	2.8	2.08333	1.88333	1.075	1.1	1.02	1.025	1.42	0.92	1.075	1	0.82	1.25	0.7	0.983333	1.02	1.8	2.74	1.8	1.06	1.5	1.4	1.75	0.98	2.06	1.13333	2.475
3	0.8	1.75	0.7	1.6	1.63333	1.6	1.2	1.06667	1.9	0.75	1.06667	1.36667	1	1	1.8	1.56667	0.566667	0.6	3.73333	2.26667	1.4	0.8	0.7	0.833333	1.53333	2	0.8	0.966667	1.16667	1.33333	1.13333		1.16667	1.36667	2.83333	1.13333	1.8	1.63333	1.23333	1.8	1.45	11	7	1.4	5.2
4	1	1.2	0.766667	1	1.8	1.45	1.13333	0.95	1.13333	0.95	1.1	1.06667	1.26667	0.966667	2.1	1.46667	0.5	0.966667	3.53333	1.63333	1.45	1.45	1.1	0.7	1.26667	3.5	1.1	0.8	0.833333	1.1	0.933333		1.2	1.3	2.2	0.966667	2.05	0.5	1.25	1.8	1.6		6.6	5.1	5.7
5	1.06667	1.16667	1.06667	0.9	1.8	1.2	1.2	1.15	1.35	0.8	0.9	1.16667	0.9	0.933333	3	2.16667	0.45	0.55	3.15	1.75	1.73333	1	1.45	0.766667	1.2	1.53333	0.7	1	1.06667	1	1.15		1.03333	1.4	2.4	1.15	2.43333	0.6	1.36667	1.8	1.76667
6	1.05	0.833333	0.666667	0.8	1.5	1.55	1.1	1.13333	1.6	0.9	1.03333	1.03333	1.06667	1.03333	3.76667	2.7	0.633333	0.866667	2.23333	1.9	1.83333	1	0.8	0.9	0.7	1.55	0.7	0.8	0.9	1	1.03333		1.05	1.55	2.33333	1.36667	1.8		1.03333	1.76667	1.3
7	1.06667	1.2	0.7	0.65	1.53333	1.5	0.9	0.866667	1.9	0.85	1.1	1.06667	1.3	0.8	4.75	3.3	0.7	0.566667	1.56667	1.93333	1.7	1.2	0.65	0.6	1.45	1.83333	0.9	0.95	1.1	0.933333	1.03333		0.8	1.46667	2.46667	1.4	1.75		1.03333	1.83333	1.56667
8	1.65	0.8	0.8	0.95	1.15	1.05	0.85	0.866667	1.8	0.95	0.8	0.866667	1.15	0.933333	3.1	2.3	0.8	0.6	1.86667	1.46667	1.9	0.7	0.9	0.8	1.4	2.63333	0.8	1.2	1.16667				0.7	1.4	2.43333	2.76667	2.2		1.1	1.93333	2.03333
9	1.6	0.9	0.9	0.833333	1.06667	0.95	1	0.966667	1	0.8	0.75	0.933333	1	1.06667	3.96667	1.76667	0.65	0.7	1.83333	1.4	1.93333	1	1.1	1.4	1.35	1.36667	0.9	0.85	1				0.833333		1.6	4.5			1.16667	2	1.96667
10	1.63333	0.95	1.2	0.95	0.966667	1.05	1.05	0.8	1.1	1.05	0.833333	1	0.85	1.05	3.16667	1.56667	0.75	0.7	1.73333	1.6	1.45	0.7	1.4	1.2	0.8	1.76667	1	0.85	1.13333				1.06667		4.7				1.56667	2.53333	2.1
11	3.05		1.2	1.35		1.2		0.8			0.75		0.8	2.55	3.63333	1.3	1.65		1.2		2.05			0.7	0.9	1.45		0.9					1.1						1.45	2.85	2.3
12	2.15		1.5	0.95		1.3		0.8			0.85		0.966667	2.16667	2.9	1.15	1.7		1.5		1.4			0.95	0.8	2		0.75					1						1.35	2.15
13	1.3		1.1	1.6		1.65		0.7			0.8		1.05	1.63333	1.96667	1.25	1.2		1.1		1.9				0.7			0.8					1						1.46667	1.95
14	1.1		1.4	1.3		1.15		0.7			0.7		1.2	0.9	2.2	1.13333	1.3		1.25		1.66667							0.7											2.86667	3.95

## Sheet: Φύλλο5
14	0.62	1.61667	0.583333	0.8	1.45	1.98	1.31667	0.92	1.675	1.05	1.1	1.1	0.9	0.85	0.883333	1.43333	0.633333	0.866667	2.8	2.08333	1.88333	1.075	1.1	1.02	1.025	1.42	0.92	1.075	1	0.82	1.25	0.7	0.983333	1.02
12	0.8	1.75	0.7	1.6	1.63333	1.6	1.2	1.06667	1.9	0.75	1.06667	1.36667	1	1	1.8	1.56667	0.566667	0.6	3.73333	2.26667	1.4	0.8	0.7	0.833333	1.53333	2	0.8	0.966667	1.16667	1.33333	1.13333		1.16667	1.36667
10	1	1.2	0.766667	1	1.8	1.45	1.13333	0.95	1.13333	0.95	1.1	1.06667	1.26667	0.966667	2.1	1.46667	0.5	0.966667	3.53333	1.63333	1.45	1.45	1.1	0.7	1.26667	3.5	1.1	0.8	0.833333	1.1	0.933333		1.2	1.3
9	1.06667	1.16667	1.06667	0.9	1.8	1.2	1.2	1.15	1.35	0.8	0.9	1.16667	0.9	0.933333	3	2.16667	0.45	0.55	3.15	1.75	1.73333	1	1.45	0.766667	1.2	1.53333	0.7	1	1.06667	1	1.15		1.03333	1.4
8	1.05	0.833333	0.666667	0.8	1.5	1.55	1.1	1.13333	1.6	0.9	1.03333	1.03333	1.06667	1.03333	3.76667	2.7	0.633333	0.866667	2.23333	1.9	1.83333	1	0.8	0.9	0.7	1.55	0.7	0.8	0.9	1	1.03333		1.05	1.55
7	1.06667	1.2	0.7	0.65	1.53333	1.5	0.9	0.866667	1.9	0.85	1.1	1.06667	1.3	0.8	4.75	3.3	0.7	0.566667	1.56667	1.93333	1.7	1.2	0.65	0.6	1.45	1.83333	0.9	0.95	1.1	0.933333	1.03333		0.8	1.46667
6	1.65	0.8	0.8	0.95	1.15	1.05	0.85	0.866667	1.8	0.95	0.8	0.866667	1.15	0.933333	3.1	2.3	0.8	0.6	1.86667	1.46667	1.9	0.7	0.9	0.8	1.4	2.63333	0.8	1.2	1.16667				0.7	1.4
5	1.6	0.9	0.9	0.833333	1.06667	0.95	1	0.966667	1	0.8	0.75	0.933333	1	1.06667	3.96667	1.76667	0.65	0.7	1.83333	1.4	1.93333	1	1.1	1.4	1.35	1.36667	0.9	0.85	1				0.833333
4	1.63333	0.95	1.2	0.95	0.966667	1.05	1.05	0.8	1.1	1.05	0.833333	1	0.85	1.05	3.16667	1.56667	0.75	0.7	1.73333	1.6	1.45	0.7	1.4	1.2	0.8	1.76667	1	0.85	1.13333				1.06667
3	3.05		1.2	1.35		1.2		0.8			0.75		0.8	2.55	3.63333	1.3	1.65		1.2		2.05			0.7	0.9	1.45		0.9					1.1
2	2.15		1.5	0.95		1.3		0.8			0.85		0.966667	2.16667	2.9	1.15	1.7		1.5		1.4			0.95	0.8	2		0.75					1
1	1.3		1.1	1.6		1.65		0.7			0.8		1.05	1.63333	1.96667	1.25	1.2		1.1		1.9				0.7			0.8					1
0	1.1		1.4	1.3		1.15		0.7			0.7		1.2	0.9	2.2	1.13333	1.3		1.25		1.66667							0.7

## Sheet: Φύλλο6
												DEATH @
14	1.8	2.74	1.8	1.06	1.5	1.4	1.75	0.98	2.06	1.13333	2.475	11
12	2.83333	1.13333	1.8	1.63333	1.23333	1.8	1.45	11	7	1.4	5.2	9
10	2.2	0.966667	2.05	0.5	1.25	1.8	1.6		6.6	5.1	5.7	8
9	2.4	1.15	2.43333	0.6	1.36667	1.8	1.76667					5
8	2.33333	1.36667	1.8		1.03333	1.76667	1.3					14
7	2.46667	1.4	1.75		1.03333	1.83333	1.56667					17
6	2.43333	2.76667	2.2		1.1	1.93333	2.03333					11
5	1.6	4.5			1.16667	2	1.96667					3
4	4.7				1.56667	2.53333	2.1					4
3					1.45	2.85	2.3					5
2					1.35	2.15						4
1					1.46667	1.95
0					2.86667	3.95

## Sheet: Φύλλο7
	2	3	4	5	6	7	8	9	10	11	12	13	14	Time to Death
1	1.8	2.83333	2.2	2.4	2.33333	2.46667	2.43333	1.6	4.7					11
2	2.74	1.13333	0.966667	1.15	1.36667	1.4	2.76667	4.5						9
3	1.8	1.8	2.05	2.43333	1.8	1.75	2.2							8
4	1.06	1.63333	0.5	0.6										5
5	1.5	1.23333	1.25	1.36667	1.03333	1.03333	1.1	1.16667	1.56667	1.45	1.35	1.46667	2.86667	14
6	1.4	1.8	1.8	1.8	1.76667	1.83333	1.93333	2	2.53333	2.85	2.15	1.95	3.95	17
7	1.75	1.45	1.6	1.76667	1.3	1.56667	2.03333	1.96667	2.1	2.3				11
8	0.98	11												3
9	2.06	7	6.6											4
10	1.13333	1.4	5.1											5
11	2.475	5.2	5.7											4
	1.72486	3.29028	2.88788	2.06458	2.22857	2.43571	2.92381	3.37222	4.18	4.4	5.16667	5.47222	6.93889

## Sheet: Φύλλο8
	2	3	4	5	6	7	8	9	10	11	12	13	14	Time to Death
1	1.8	2.83333	2.2	2.4	2.33333	2.46667	2.43333	1.6	4.7					11
2	2.74	1.13333	0.966667	1.15	1.36667	1.4	2.76667	4.5						9
3	1.8	1.8	2.05	2.43333	1.8	1.75	2.2							8
4	1.06	1.63333	0.5	0.6										5
5	1.5	1.23333	1.25	1.36667	1.03333	1.03333	1.1	1.16667	1.56667	1.45	1.35	1.46667	2.86667	14
6	1.4	1.8	1.8	1.8	1.76667	1.83333	1.93333	2	2.53333	2.85	2.15	1.95	3.95	17
7	1.75	1.45	1.6	1.76667	1.3	1.56667	2.03333	1.96667	2.1	2.3				11
Mean	1.72486	3.29028	2.88788	2.06458	2.22857	2.43571	2.92381	3.37222	4.18	4.4	5.16667	5.47222	6.93889
